# THE AMERICAN JOURNAL OF PSYCHIATRY

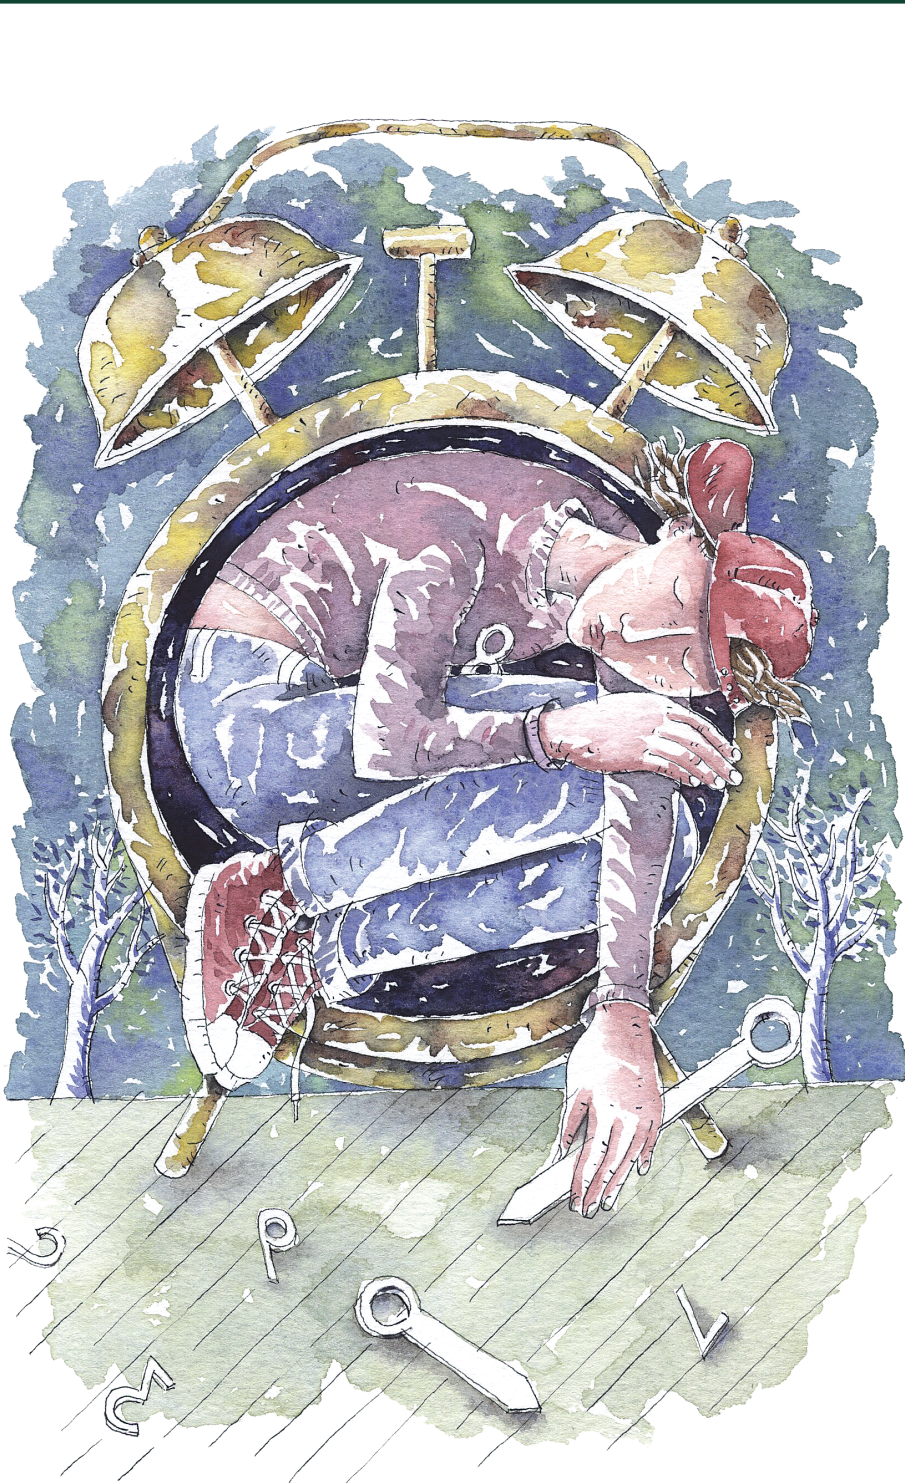

Does Fetal Exposure to SSRIs  
or Maternal Depression Impact  
Infant Growth?

Katherine L. Wisner, M.D., M.S., et al. 475

Effects of News Media Messages  
About Mass Shootings on  
Attitudes Toward Persons With  
Serious Mental Illness and Public  
Support for Gun Control Policies

Emma E. McGinty, M.S., et al. 486

◀ Prevalence and Correlates of  
Prolonged Fatigue in a U.S.  
Sample of Adolescents

Femke Lamers, Ph.D., et al. 497

Genome-Wide Methylation  
Changes in the Brains of Suicide  
Completers

Benoit Labonté, M.Sc., et al. 510

May 2013

Volume 170 • Number 5

Official Journal of the  
AMERICAN PSYCHIATRIC ASSOCIATION

[ajp.psychiatryonline.org](http://ajp.psychiatryonline.org)
