# THE AMERICAN JOURNAL OF PSYCHIATRY

## En este número

A32

### Perspectivas

#### Editoriales

453 **Tratar o no tratar la depresión perinatal con antidepresivos: Efectos en el crecimiento del bebé**

Barbara L. Parry

455 **¿Como debe responder la psiquiatría a los recientes asesinatos en masa?**

Richard A. Friedman y Robert Michels

459 **Fatiga incapacitante crónica en adolescentes**

Gijs Bleijenberg y Hans Knoop

462 **La neuro-epigenética del suicidio**

Schahram Akbarian y Tobias Halene **Audio**

#### Comentario

466 **Proteger la confidencialidad en la investigación con humanos**

Bryon Adinoff, Robert R. Conley, Stephan F. Taylor, y Linda L. Chezem

#### Tratamiento en Psiquiatría

471 **Pérdida de la libido en una mujer con esquizofrenia**

Mary V. Seeman **Audio** **Guías clínicas**

#### Imágenes en Psiquiatría

476 **La cueva de San Antonio de Qozhaya: un refugio pionero para los enfermos mentales en el Medio Oriente**

Rami Bou Khalil

#### Resúmenes y Reseñas

477 **La enigmática persistencia de la anorexia nervosa**

B. Timothy Walsh **Audio** **EMC** **Guías clínicas**

### Nuevas investigaciones

#### Artículos

485 **¿Tienen la exposición fetal a ISRSs o la depresión maternal algún impacto en el crecimiento del bebé?**

Katherine L. Wisner, Debra L. Bogen, Dorothy Sit, Mary McShea, Carolyn Hughes, David Rizzo, Andrea Confer, James Luther, Heather Eng, y Stephen W. Wisniewski **Audio** **Editorial** **Guías clínicas**

494 **Efectos que tienen los mensajes de los medios de comunicación acerca de los asesinatos en masa sobre las actitudes hacia personas con enfermedades mentales graves y sobre el apoyo público a las políticas de control de armas**

Emma E. McGinty, Daniel W. Webster, y Colleen L. Barry **Audio** **Editorial**

502 **Prevalencia y correlatos de la fatiga prolongada en una muestra de adolescentes de Estados Unidos**

Femke Lamers, Ian Hickie, y Kathleen R. Merikangas **Audio** **Editorial** **EMC**

511 **Cambios en la metilación genómica en el cerebro de las personas que se suicidan**

Benoit Labonté, Matt Suderman, Gilles Maussion, Juan Pablo Lopez, Luis Navarro-Sánchez, Volodymyr Yerko, Naguib Mechawar, Moshe Szyf, Michael J. Meaney, y Gustavo Turecki **Audio** **Editorial**

521 **Análisis de ligazón a nivel genómico de 12 endofenotipos para la esquizofrenia, del Consorcio sobre Genética de la Esquizofrenia**

Tiffany A. Greenwood, Neal R. Swerdlow, Raquel E. Gur, Kristin S. Cadenhead, Monica E. Calkins, Dorcas J. Dobie, Robert Freedman, Michael F. Green, Ruben C. Gur, Laura C. Lazzeroni, Keith H. Nuechterlein, Ann Olincy, Allen D. Radant, Amrita Ray, Nicholas J. Schork, Larry J. Seidman, Larry J. Siever, Jeremy M. Silverman, William S. Stone, Catherine A. Sugar, Debby W. Tsuang, Ming T. Tsuang, Bruce I. Turetsky, Gregory A. Light, y David L. Braff

533 **Actividad del estriado ventral en respuesta a la recompensa: Diferencias entre los trastornos bipolares I y II**

Xavier Caseras, Natalia S. Lawrence, Kevin Murphy, Richard G. Wise, y Mary L. Phillips **EMC**

542 **El estudio holandés de hijos de bipolares [Dutch Bipolar Offspring Study]: Seguimiento de 12 años**

Esther Mesman, Willem A. Nolen, Catrien G. Reichart, Marjolein Wals, y Manon H.J. Hillegers

550 **Velocidad defectuosa de procesamiento y experiencias psicóticas no clínicas en niños: análisis longitudinales en una gran cohorte de nacimientos**

Maria Niarchou, Stanley Zammit, James Walters, Glyn Lewis, Michael John Owen, y Marianne Bernadette van den Bree

## Comunicados y actualizaciones

### Cartas al Editor

- 558 Recaída de depresión mayor en mujeres que continúan o descontinúan los antidepresivos durante el embarazo  
¿En quién funciona el litio?  
El metilfolato como tratamiento adyuvante en la depresión mayor  
Regulación de la expresión del gen NOTCH4 en el trastorno bipolar: estudios futuros

### Reseñas Bibliográficas

- 562 Black and Blue: The Origins and Consequences of Medical Racism [Negro y Azul: Los orígenes y las consecuencias del racismo médico]  
Generalized Anxiety Disorder [Trastorno de ansiedad generalizada]  
American Madness: The Rise and Fall of Dementia Praecox [La locura norteamericana: el auge y la caída de la demencia precoz]

Restoring Mentalizing in Attachment Relationships: Treating Trauma With Plain Old Therapy [Restablecer la mentalización en las relaciones de apego: Tratar el trauma con la terapia de siempre]

### 566 Libros Recibidos

### 566 Correction

### Otros temas de interés

### 567 Educación Médica Continuada

### A16 Directivos de la American Psychiatric Association

### A18 Calendario

### A30 Contenidos del *British Journal of Psychiatry*

### Cubierta

Diseño de la cubierta de Sergey Ivanov.

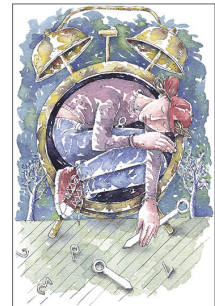

#### Audio

artículo en AJP Audio: archivo .mp3 descargable de [ajp.psychiatryonline.org](http://ajp.psychiatryonline.org)

#### Guías clínicas

este artículo ofrece guías clínicas (ver pagina "En este Número" o al final del artículo)

#### EMC

existe un curso en línea que cubre los contenidos de este artículo para los suscriptores del programa de cursos de EMC del AJP

#### Editorial

este artículo se discute en uno de los editoriales de este número

This issue's Spanish Table of Contents is presented in collaboration with the Office of Global Health, UMDNJ-Robert Wood Johnson Medical School

Translation courtesy of

Sergi Casals, M.S.

*Garuna Editors (www.garunaeditors.com), Barcelona, Spain*

Carlos Lopez Jaramillo, M.D.

*Universidad de Antioquia, Medellin, Colombia*

and

Javier I. Escobar, M.D., M.Sc.

*UMDNJ-Robert Wood Johnson Medical School*
